# Supplementary material for: In Silico Analysis of Small RNAs Suggest Roles for Novel and Conserved miRNAs in the Formation of Epigenetic Memory in Somatic Embryos of Norway Spruce
Source: PubMed Central journal article supplement (PMC5596105; doi:10.3389/fphys.2017.00674), 2017-09-08
Supplement: Image3.pdf [file Image3.pdf]

Suppl. figure S3. Comparison of transcription profiles of selected differentially expressed predicted miRNA–gene functional pairs, involved in EpI temperature-dependent regulatory processes

| ## | Graph                                                                                                                                                                                                                                                                                                                                                          | Predicted target IDs | Pfam annotation                                                                                                                                                                                                                                                                                                                                                                                                          |
|----|----------------------------------------------------------------------------------------------------------------------------------------------------------------------------------------------------------------------------------------------------------------------------------------------------------------------------------------------------------------|----------------------|--------------------------------------------------------------------------------------------------------------------------------------------------------------------------------------------------------------------------------------------------------------------------------------------------------------------------------------------------------------------------------------------------------------------------|
| 1. | <p>Legend for Graph 1:</p> <ul style="list-style-type: none"> <li>MA_10433003g0010 (Blue diamonds)</li> <li>Pab-miR950.72 (Red squares)</li> <li>Pab-miR950.69 (Green triangles)</li> <li>Pab-miR950.67 (Purple crosses)</li> <li>Pab-miR950.68 (Cyan asterisks)</li> <li>Pab-miR950.70 (Orange circles)</li> <li>Pab-miR950.59 (Light blue pluses)</li> </ul> | MA_10433003g0010     | PF00931 - NB-ARC domain; PF01582; PF13676 - TIR domain; PF01637 - Archaeal ATPase; PF01656 - CobQ/CobB/MinD/ParA nucleotide binding domain; PF03205 - Molybdopterin guanine dinucleotide synthesis protein B; PF03308 - ArgK protein; PF04665 - Poxvirus A32 protein; PF05729 - NACHT domain; PF06745 - KaiC; PF08477 - Miro-like protein; PF13191 - AAA ATPase domain; PF13173; PF13207; ;PF13238; PF13401 - AAA domain |
| 2. | <p>Legend for Graph 2:</p> <ul style="list-style-type: none"> <li>MA_55143g0010 (Blue diamonds)</li> <li>Pab-miRn0282.1 (Red squares)</li> <li>Pab-miRn0054.4_5p (Green triangles)</li> <li>Pab-miR950.59 (Purple crosses)</li> <li>Pab-miR950.72 (Cyan asterisks)</li> </ul>                                                                                  | MA_55143g0010        | PF00560 - Leucine Rich Repeat; PF00931 - NB-ARC domain; PF01582 - TIR domain; PF08937 - MTH538 TIR-like domain (DUF1863); PF12799 - Leucine Rich repeats (2 copies); PF12826 - Helix-hairpin-helix motif; PF13306 - Leucine rich repeats (6 copies); PF13504 - Leucine rich repeat; PF13676 - TIR domain; PF13855 - Leucine rich repeat                                                                                  |

|    |  |                  |                                                                                                                                                    |
|----|--|------------------|----------------------------------------------------------------------------------------------------------------------------------------------------|
| 3. |  | MA_10270868g0010 | LRR receptor-like serine/threonine-protein kinase At3g47570 isoform X2 [Gossypium raimondii]                                                       |
| 4. |  | MA_8078038g0010  | PF00931 - NB-ARC domain                                                                                                                            |
|    |  | MA_9426471g0010  | PF12799 - Leucine Rich repeats (2 copies)                                                                                                          |
|    |  | MA_8007994g0010  | PF12799 - Leucine Rich repeats (2 copies)                                                                                                          |
|    |  | MA_10433915g0010 | PF00931 - NB-ARC domain; PF08561 - Mitochondrial ribosomal protein L37; PF11568 - Mediator complex subunit 29                                      |
|    |  | MA_10432475g0010 | PF00004 - ATPase family associated with various cellular activities (AAA); PF00931 - NB-ARC domain; PF01637 - Archaeal ATPase                      |
|    |  | MA_10427224g0010 | PF00004 - ATPase family associated with various cellular activities (AAA); PF00931 - NB-ARC domain; PF01637 - Archaeal ATPase                      |
|    |  | MA_112209g0020   | PF00004 - ATPase family associated with various cellular activities (AAA); PF00931 - NB-ARC domain; PF01582 - TIR domain                           |
|    |  | MA_160159g0010   | PF00560 - Leucine Rich Repeat; PF00931 - NB-ARC domain; PF01582 - TIR domain                                                                       |
|    |  | MA_8638817g0010  | PF00004 - ATPase family associated with various cellular activities (AAA); PF00931 - NB-ARC domain; PF01637 - Archaeal ATPase                      |
|    |  | MA_73017g0010    | PF00004 - ATPase family associated with various cellular activities (AAA); PF00560 - Leucine Rich Repeat; PF00931 - NB-ARC domain                  |
|    |  | MA_135183g0010   | PF00560 - Leucine Rich Repeat; PF00931 - NB-ARC domain; PF01582 - TIR domain                                                                       |
|    |  | MA_10436643g0010 | PF00004 - ATPase family associated with various cellular activities (AAA); PF00025 - ADP-ribosylation factor family; PF00560 - Leucine Rich Repeat |

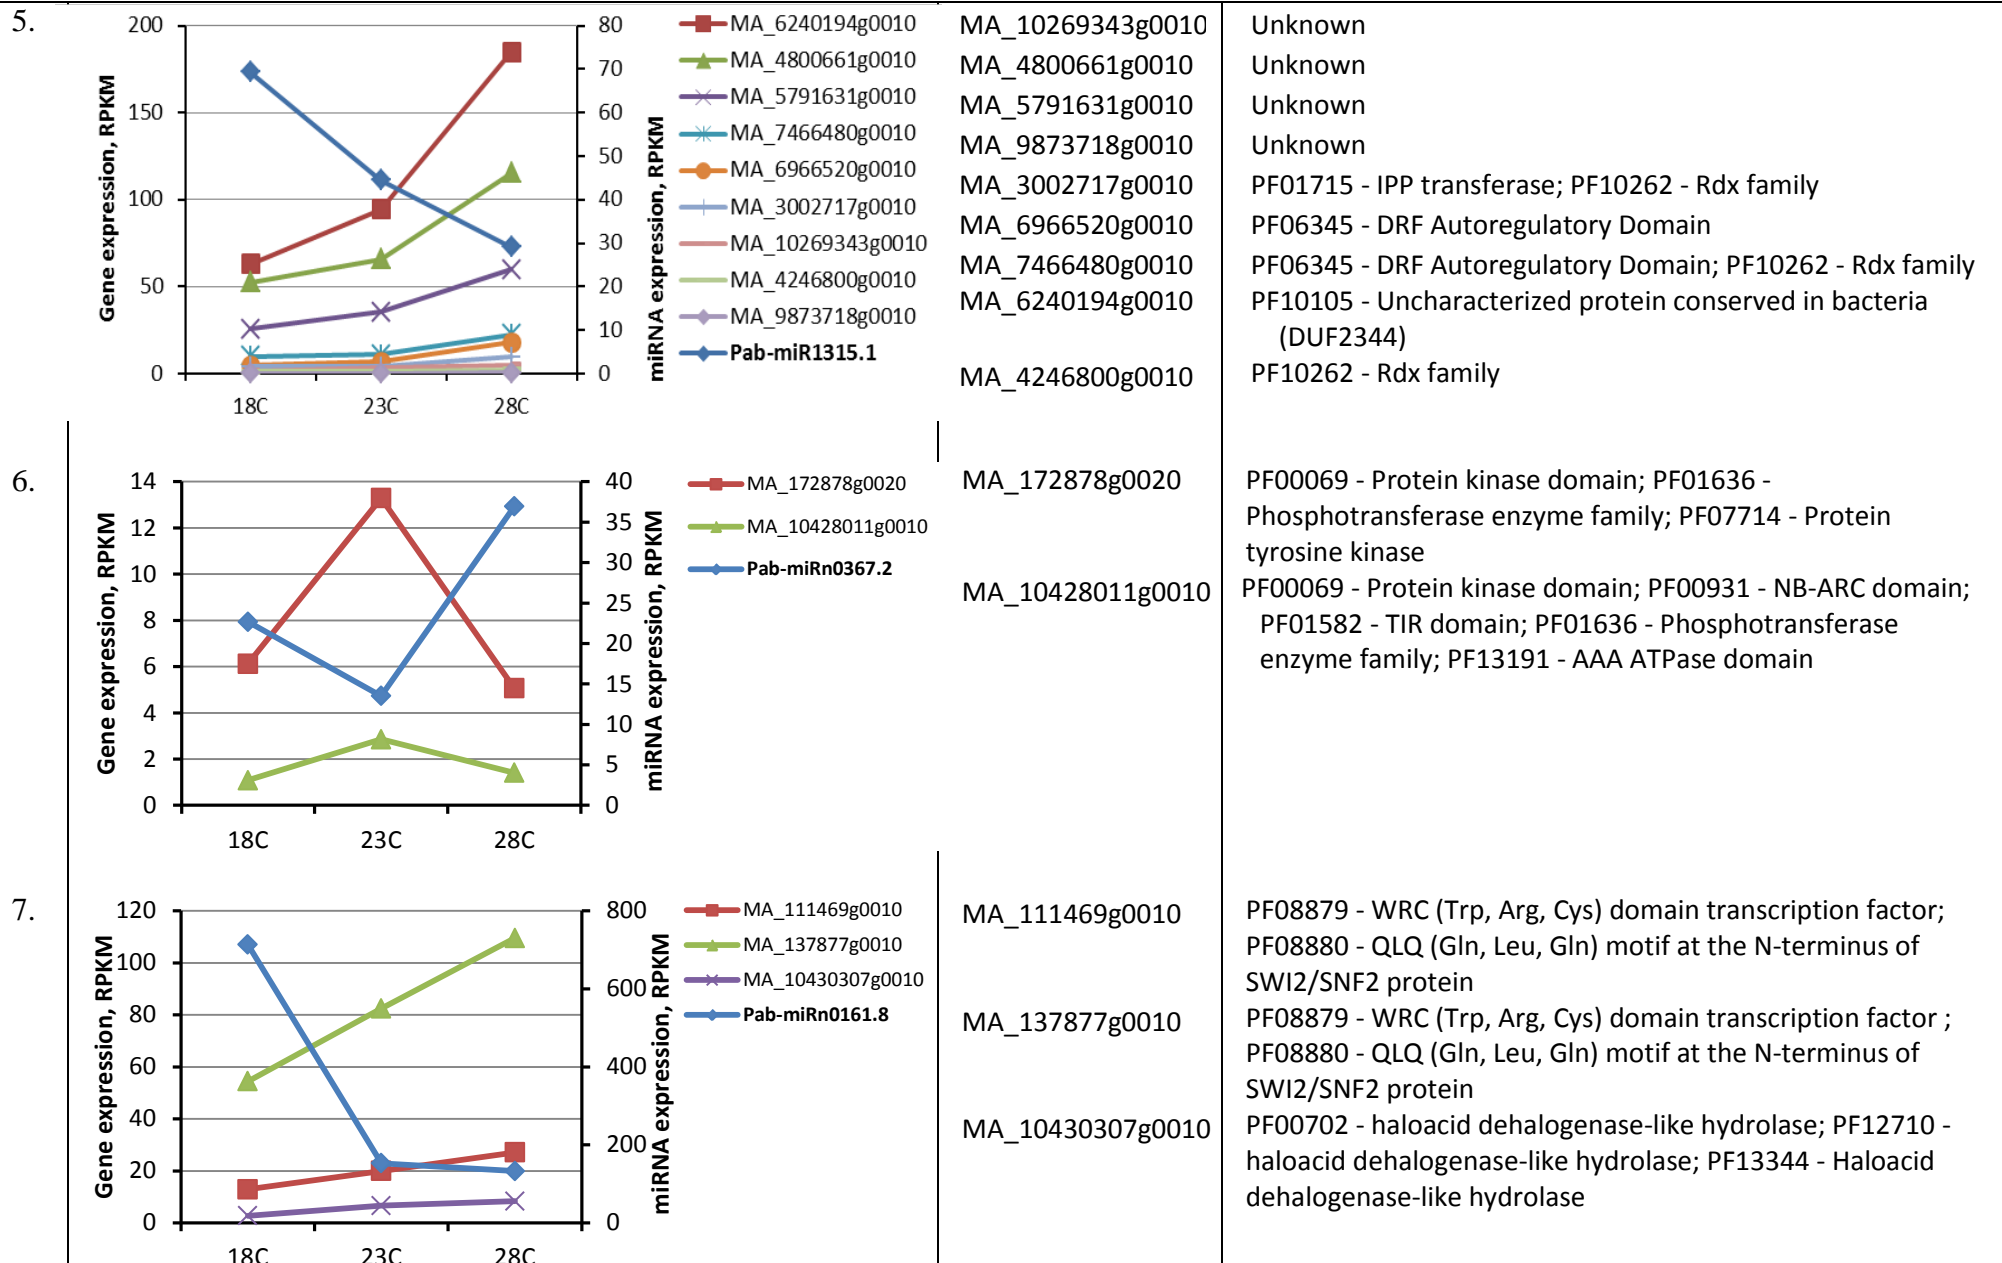

|     |                                                                                                                                                                                                                                                                                                                                                       |                 |                                                                                                                                                                                                                                      |
|-----|-------------------------------------------------------------------------------------------------------------------------------------------------------------------------------------------------------------------------------------------------------------------------------------------------------------------------------------------------------|-----------------|--------------------------------------------------------------------------------------------------------------------------------------------------------------------------------------------------------------------------------------|
| 8.  | <p>Gene expression, RPKM (left axis, 0.0 to 2.0) and miRNA expression, RPKM (right axis, 0 to 90) are plotted against developmental stages 18C, 23C, and 28C. MA_13178g0010 (green triangles) increases from ~0.3 to ~1.6. Pab-miRn0252.8_5p (blue diamonds) decreases from ~18 to ~5. Pab-miRn0252.9_5p (red squares) decreases from ~85 to ~30.</p> | MA_13178g0010   | PF08167 - rRNA processing/ribosome biogenesis; PF11483 - Protein of unknown function (DUF3209); PF11865 - Domain of unknown function (DUF3385); PF13513 - HEAT-like repeat; PF13646 - HEAT repeats                                   |
| 9.  | <p>Gene expression, RPKM (left axis, 0 to 10) and miRNA expression, RPKM (right axis, 0 to 60) are plotted against developmental stages 18C, 23C, and 28C. MA_97097g0010 (red squares) increases from ~10 to ~40. MA_10433968g0020 (green triangles) increases from ~10 to ~55. Pab-miRn0108.18_5p (blue diamonds) decreases from ~55 to ~15.</p>     | MA_97097g0010   | PF00097 - Zinc finger, C3HC4 type (RING finger); PF03031 - NLI interacting factor-like phosphatase; PF11793 - FANCL C-terminal domain; PF12678 - RING-H2 zinc finger; PF12861 - Anaphase-promoting complex subunit 11 RING-H2 finger |
| 10. | <p>Gene expression, RPKM (left axis, 0 to 7) and miRNA expression, RPKM (right axis, 0 to 35) are plotted against developmental stages 18C, 23C, and 28C. MA_8090186g0010 (red squares) increases from ~5 to ~32. MA_2193g0020 (green triangles) increases from ~3 to ~10. Pab-miR172.2 (blue diamonds) decreases from ~32 to ~15.</p>                | MA_8090186g0010 | PF00847 - AP2 domain                                                                                                                                                                                                                 |
|     |                                                                                                                                                                                                                                                                                                                                                       | MA_2193g0020    | PF00847 - AP2 domain                                                                                                                                                                                                                 |

|     |  |                                           |                                                                                                                             |
|-----|--|-------------------------------------------|-----------------------------------------------------------------------------------------------------------------------------|
| 11. |  | <p>MA_10436505g0010<br/>MA_17313g0010</p> | <p>PF08744 - Plant transcription factor NOZZLE<br/>PF02045 - CCAAT-binding transcription factor (CBF-B/NF-YA) subunit B</p> |
| 12. |  | <p>MA_946897g0010</p>                     | <p>PF08506 - N-terminal Cse1 (chromosome-segregation protein) domain protein</p>                                            |

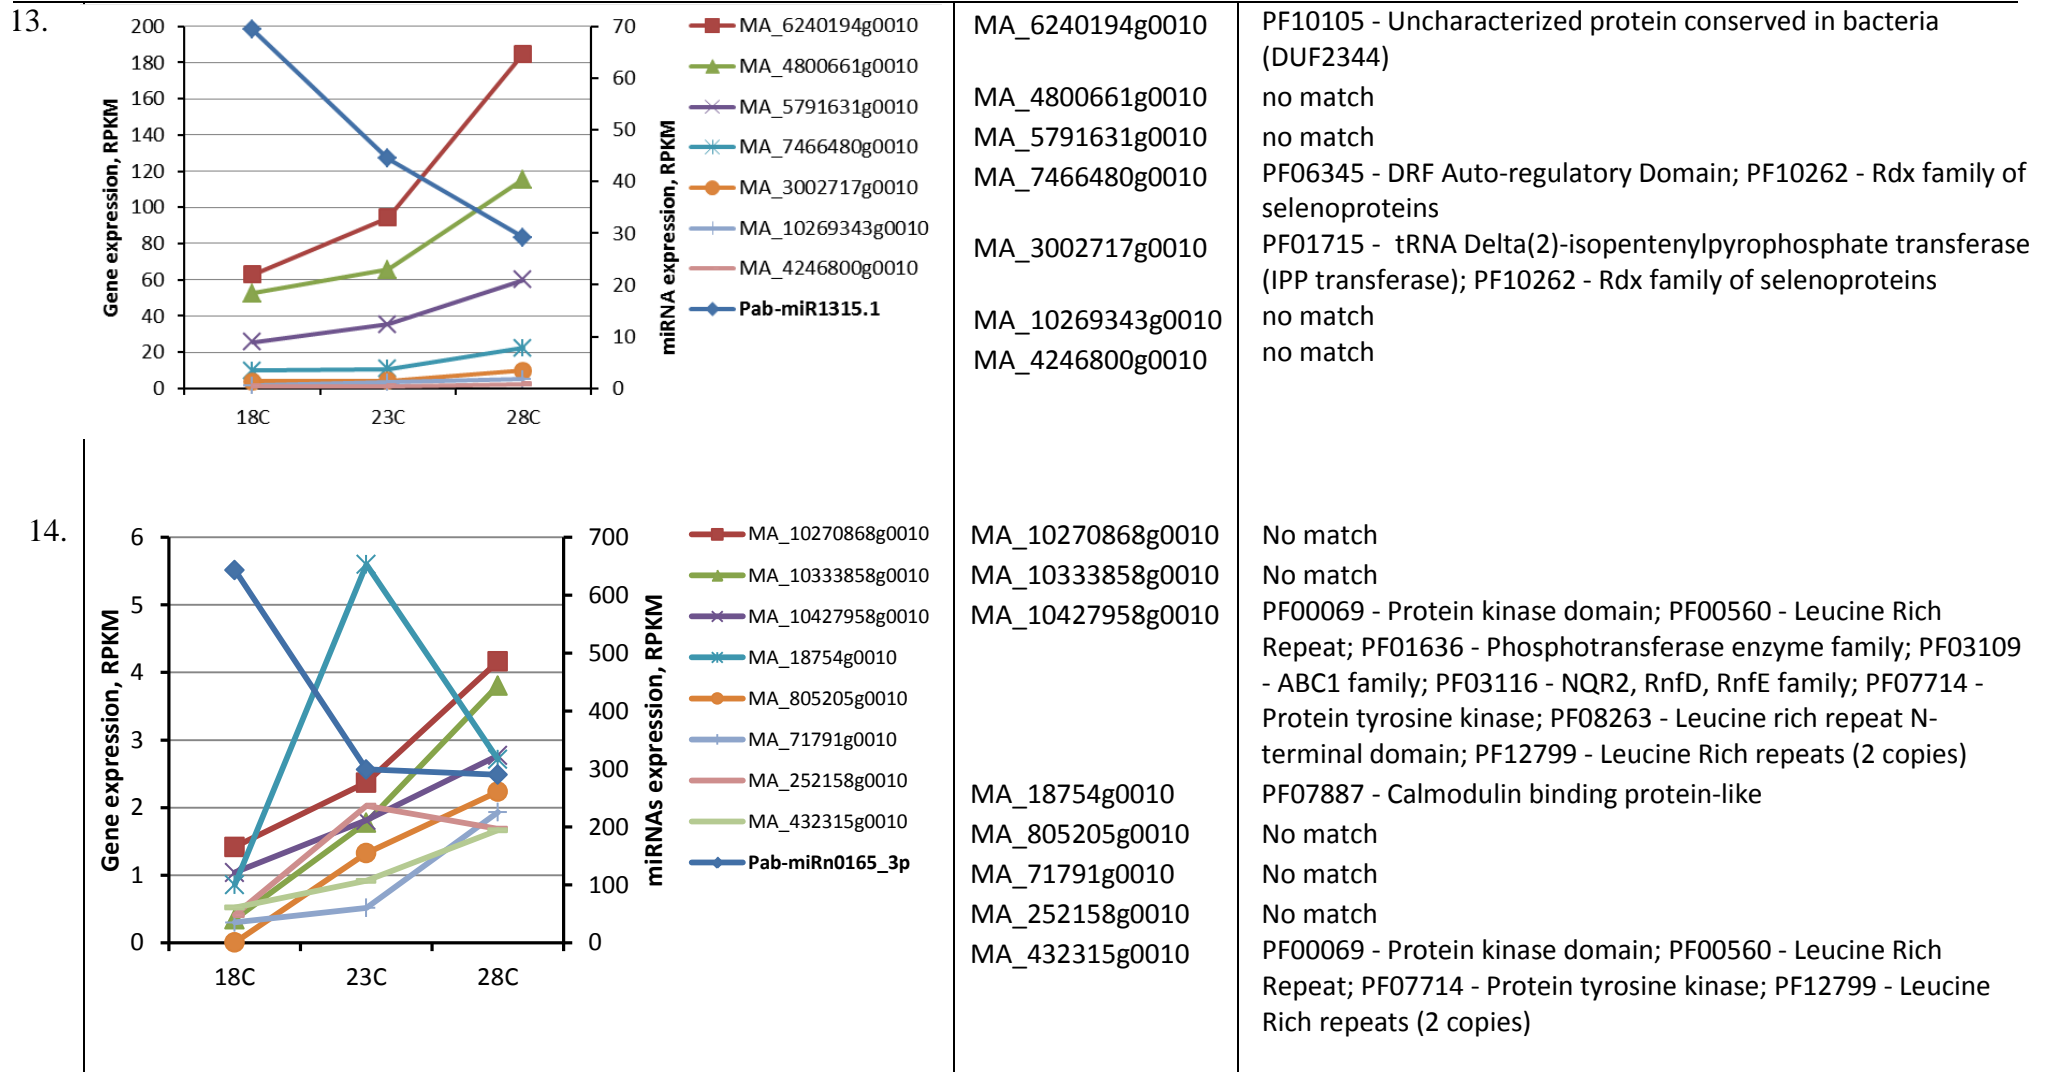

|     |                                                                                                                                                            |                                                           |                                                                                                                                                                                                                                     |
|-----|------------------------------------------------------------------------------------------------------------------------------------------------------------|-----------------------------------------------------------|-------------------------------------------------------------------------------------------------------------------------------------------------------------------------------------------------------------------------------------|
| 15. | <p>Gene expression, RPKM</p> <p>miRNAs expression, RPKM</p> <p>18C 23C 28C</p> <p>MA_138103g0010<br/>MA_23673g0010<br/>MA_38814g0010<br/>Pab-miRn0221</p>  | <p>MA_138103g0010<br/>MA_23673g0010<br/>MA_38814g0010</p> | <p>PF00646 - F-box domain; PF12937 - F-box-like<br/>PF00847 - AP2 domain; PF02362 - B3 DNA binding domain<br/>PF00646 - F-box domain; PF01344 - Kelch motif; PF07646 - Kelch motif; PF12937 - F-box-like; PF13964 - Kelch motif</p> |
| 16. | <p>Gene expression, RPKM</p> <p>miRNA expression, RPKM</p> <p>18C 23C 28C</p> <p>MA_54068g0010<br/>MA_128155g0010<br/>MA_51652g0010<br/>Pab-miRn0059.3</p> | <p>MA_54068g0010<br/>MA_128155g0010<br/>MA_51652g0010</p> | <p>PF00420 - NADH-ubiquinone/plastoquinone oxidoreductase chain 4L<br/>No match<br/>PF08744 - Plant transcription factor NOZZLE</p>                                                                                                 |

|     |                                                                                                                                                                                                                                                                                                                         |                                                                                                                                                                                                                                                                                                |                                                                                                                                                                                                                                                                                                                                                                                                                                                                                                                                                                                                                                                                                                                                                                                                                                                                                                                                                                                                                                                                                                                                                             |
|-----|-------------------------------------------------------------------------------------------------------------------------------------------------------------------------------------------------------------------------------------------------------------------------------------------------------------------------|------------------------------------------------------------------------------------------------------------------------------------------------------------------------------------------------------------------------------------------------------------------------------------------------|-------------------------------------------------------------------------------------------------------------------------------------------------------------------------------------------------------------------------------------------------------------------------------------------------------------------------------------------------------------------------------------------------------------------------------------------------------------------------------------------------------------------------------------------------------------------------------------------------------------------------------------------------------------------------------------------------------------------------------------------------------------------------------------------------------------------------------------------------------------------------------------------------------------------------------------------------------------------------------------------------------------------------------------------------------------------------------------------------------------------------------------------------------------|
| 17. | <p>Gene expression, RPKM</p> <p>miRNA expression, RPKM</p> <p>18C 23C 28C</p> <p>MA_7165770g0010<br/>MA_188933g0010<br/>MA_396966g0010<br/>Pab-miRn0381_3p</p>                                                                                                                                                          | <p>MA_7165770g0010</p> <p>MA_188933g0010</p> <p>MA_396966g0010</p>                                                                                                                                                                                                                             | <p>PF01397 - Terpene synthase, N-terminal domain; PF13249 - Prenyltransferase-like</p> <p>PF01397 - Terpene synthase, N-terminal domain</p> <p>PF01397 - Terpene synthase, N-terminal domain; PF13249 - Prenyltransferase-like</p>                                                                                                                                                                                                                                                                                                                                                                                                                                                                                                                                                                                                                                                                                                                                                                                                                                                                                                                          |
| 18. | <p>Gene expression, RPKM</p> <p>miRNA expression, RPKM</p> <p>18C 23C 28C</p> <p>MA_65862g0010<br/>MA_10431476g0010<br/>MA_131437g0010<br/>MA_49545g0010<br/>MA_36643g0010<br/>MA_100606g0010<br/>MA_916566g0010<br/>MA_547597g0010<br/>MA_10431227g0020<br/>MA_55967g0010<br/>MA_491886g0010<br/>Pab-miRn0449.2_5p</p> | <p>MA_65862g0010</p> <p>MA_10431476g0010</p> <p>MA_131437g0010</p> <p>MA_49545g0010</p> <p>MA_36643g0010</p> <p>MA_100606g0010</p> <p>MA_916566g0010</p> <p>MA_547597g0010</p> <p>MA_10431227g0020</p> <p>MA_55967g0010</p> <p>MA_491886g0010</p> <p>MA_10431227g0020</p> <p>MA_55967g0010</p> | <p>PF00637 - Region in Clathrin and VPS; PF01535 - PPR repeat; PF04733 - Coatomer epsilon subunit</p> <p>PF01535 - PPR repeat; PF12854 - PPR repeat; PF13041 - PPR repeat family ; PF13431 - Tetratricopeptide repeat</p> <p>PF01535 - PPR repeat; PF12854 - PPR repeat; PF13041 - PPR repeat family ; PF13812 - Pentatricopeptide repeat domain</p> <p>PF01535 - PPR repeat; PF03704 - Bacterial transcriptional activator domain; PF10602 - 26S proteasome subunit RPN7; PF12854 - PPR repeat</p> <p>PF00418 - Tau and MAP protein, tubulin-binding repeat; PF00515 - Tetratricopeptide repeat; PF00637 - Region in Clathrin and VPS; PF01535 - PPR repeat</p> <p>PF00515 - Tetratricopeptide repeat; PF01535 - PPR repeat; PF02758 - PAAD/DAPIN/Pyrin domain; PF04733 - Coatomer epsilon subunit</p> <p>PF01535 - PPR repeat; PF03704 - Bacterial transcriptional activator domain; PF07443 - HepA-related protein (HARP); PF07719 - Tetratricopeptide repeat</p> <p>PF00515 - Tetratricopeptide repeat; PF01535 - PPR repeat; PF03704 - Bacterial transcriptional activator domain</p> <p>PF00515 - Tetratricopeptide repeat; PF01535 - PPR repeat;</p> |



19.

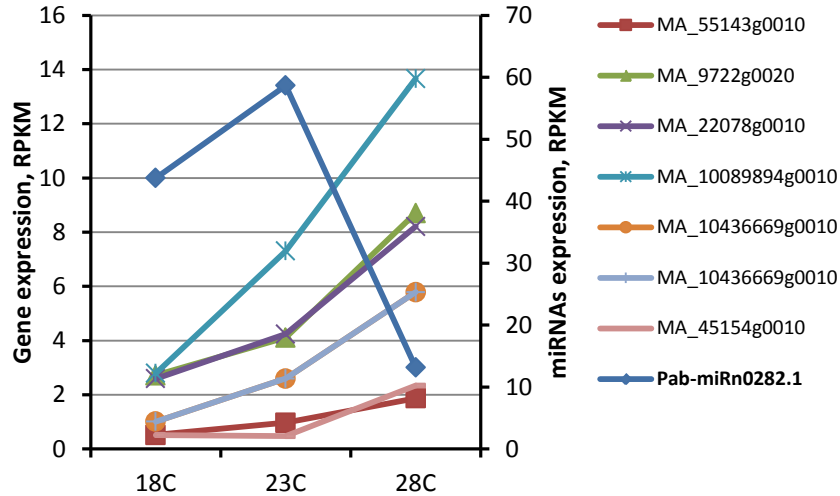

MA\_491886g0010

PF03704 - Bacterial transcriptional activator domain; PF07719 - Tetratricopeptide repeat  
PF01535 - PPR repeat; PF10602 - 26S proteasome subunit RPN7; PF12854 - PPR repeat; PF13041 - PPR repeat family

MA\_55143g0010

PF00560 - Leucine Rich Repeat; PF00931 - NB-ARC domain; PF01637 - Archaeal ATPase; PF08937 - MTH538 TIR-like domain (DUF1863); PF12799 - Leucine Rich repeats (2 copies); PF12826 - Helix-hairpin-helix motif

MA\_9722g0020

PF00931 - NB-ARC domain; PF01582 - TIR domain; PF01637 - Archaeal ATPase; PF01926 - 50S ribosome-binding GTPase; PF03205 - Molybdopterin guanine dinucleotide synthesis protein B

MA\_22078g0010

PF00931 - NB-ARC domain; PF01582 - TIR domain; PF01637 - Archaeal ATPase; PF03205 - Molybdopterin guanine dinucleotide synthesis protein B; PF03308 - ArgK protein; PF05729 - NACHT domain

MA\_10089894g0010

PF00931 - NB-ARC domain; PF01582 - TIR domain; PF03205 - Molybdopterin guanine dinucleotide synthesis protein B; PF13191 - AAA ATPase domain; PF05729 - NACHT domain;

MA\_10436669g0010

PF01582 - TIR domain; PF02492 - CobW/HypB/UreG, nucleotide-binding domain; PF03205 - Molybdopterin guanine dinucleotide synthesis protein B; PF08937 - MTH538 TIR-like domain (DUF1863); PF13086 - AAA domain

MA\_45154g0010

PF01582 - TIR domain; PF13676 - TIR domain

20.

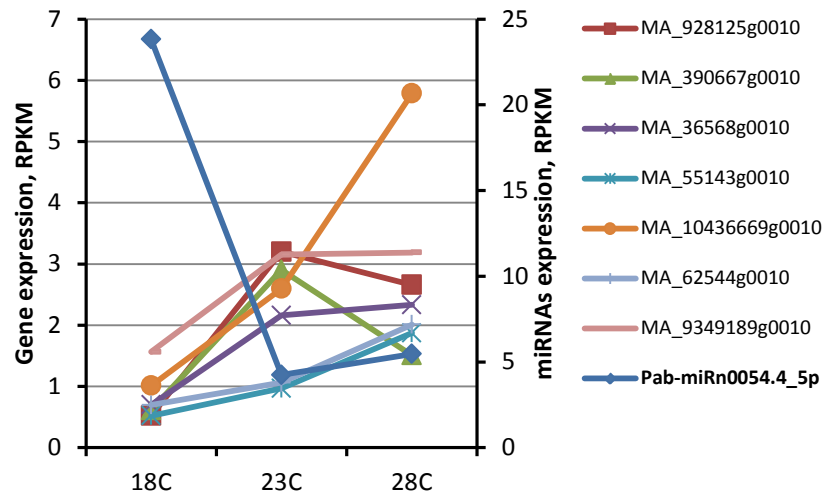

MA\_928125g0010

MA\_390667g0010

MA\_36568g0010

MA\_55143g0010

MA\_10436669g0010

MA\_62544g0010

MA\_9349189g0010

PF00004 - ATPase family associated with various cellular activities (AAA); PF00931 - NB-ARC domain; PF01582 - TIR domain; PF01926 - 50S ribosome-binding GTPase; PF12799 - Leucine Rich repeats (2 copies); PF13676 - TIR domain  
 PF00931 - NB-ARC domain; PF01582 - TIR domain; PF03205 - Molybdopterin guanine dinucleotide synthesis protein B; PF05729 - NACHT domain; PF13191 - AAA ATPase domain; PF13676 - TIR domain  
 PF00560 - Leucine Rich Repeat; PF00931 - NB-ARC domain; PF01582 - TIR domain; PF03205 - Molybdopterin guanine dinucleotide synthesis protein PF13855 - Leucine rich repeat  
 PF00560 - Leucine Rich Repeat; PF00931 - NB-ARC domain; PF01582 - TIR domain; PF12826 - Helix-hairpin-helix motif; PF13306 - Leucine rich repeats (6 copies)  
 PF01582 - TIR domain; PF02492 - CobW/HypB/UreG, nucleotide-binding domain; PF03205 - Molybdopterin guanine dinucleotide synthesis protein B; PF13191 - AAA ATPase domain; PF13676 - TIR domain  
 PF00560 - Leucine Rich Repeat; PF00931 - NB-ARC domain; PF01582 - TIR domain ; PF13191 - AAA ATPase domain; PF13401 - AAA domain; PF13504 - Leucine rich repeat  
 PF00931 - NB-ARC domain; PF01582 - TIR domain; PF01926 - 50S ribosome-binding GTPase; PF13191 - AAA ATPase domain; PF13676 - TIR domain
